# Supplementary material
Source: Springer Nature journal article supplement (https://www.springermedizin.de/resource/supplementary/12967_2012_1471_MOESM6_ESM.pdf/9574766)
Supplement: MOESM6 [file 9574766]

A  
CXCR4 expression in tumor cells

P = 0.009  
R = 0.224

C

MIF expression in tumor cells

B  
CXCR4 expression in lymphocytes

P = 0.026  
R = 0.191

D

MIF expression in lymphocytes
